# Supplementary material
Source: Royal Society of Chemistry journal article supplement (doi:10.1039/d5fo05343a)
Supplement: d5fo05343a1.xlsx [file d5fo05343a1.xlsx]

## Sheet: Sheet1
Number	Name	Gender	Age	Nation	Group	Hight	Weight	BMI	Duration	medicine	SP	DP	Energy	Protein	Protein1	Fat	Fat1	Carbohydrate	Carbohydrate1	SFA	MUFA	PUFA	SP1	SP2	CSP	DP1	DP2	CDP	DDT1	DDT2	CDDT	PDV1	PDV2	CPDV	PSV1	PSV2	CPSV	DSVR1	DSVR2	CDSVR	EDV1	EDV2	CEDV	RI1	RI2	CRI	DDR1	DDR2	CDDR
002LSJ	梁松菊	2	58	1	1	1.55	65	27.0552	6	1	146	79	1461.36	70.32	0.192478	59.84	0.368533	160.38	0.438988	14.12	18.41	14.1	146	131	-15	79	73	-6	467	499	32	37.6	36.1	-1.5	24.4	23.8	-0.6	1.54	1.53	-0.01	15.2	16.2	1	0.38	0.32	-0.06	47.3	47.4	0.1
003LSQ	梁松芹	2	54	1	1	1.64	65	24.1672	10	1	119	78	2135.16	98.06	0.183705	100.64	0.424212	209.33	0.392158	10.92	15.89	13.19	119	136	17	78	95	17	306	459	153	32.1	39.3	7.2	17.8	19.4	1.6	1.8	2.03	0.23	14.5	17.8	3.3	0.19	0.08	-0.11	45.8	43.7	-2.1
004LSD	梁松东	1	60	1	1	1.72	60	20.2812	10	1	157	95	1451.9	77.35	0.2131	65.11	0.403602	139.14	0.383332	15.36	19.77	17.58	157	163	6	95	95	0	383	510	127	28.9	28.9	0	17.8	17.8	0	1.62	1.62	0	15.7	11.2	-4.5	0.12	0.37	0.25	34.8	30.2	-4.6
005ZXW	周祥文	1	60	1	1	1.66	68	24.677	2	1	149	90	2076.53	59.12	0.113882	119.44	0.517671	191.3	0.368499	9.19	22.78	29.1	149	143	-6	90	85	-5	428	312	-116	30.8	43.7	12.9	21.7	25.8	4.1	1.42	1.67	0.25	15.8	24.6	8.8	0.27	0.05	-0.22	34.5	51.9	17.4
007WF	王芳	2	53	2	1	1.65	60	22.0386	2	2	122	69	1423	62.52	0.175741	50.57	0.319838	179.42	0.504343	9.14	11.8	8.45	122	122	0	69	69	0	510	589	79	39.1	38.5	-0.6	23.5	20.4	-3.1	1.66	1.89	0.23	16.8	17.8	1	0.29	0.13	-0.16	44.3	30.5	-13.8
011GFY	耿夫运	1	69	1	1	1.75	85	27.7551	3	2	160	97	2190.06	76.41	0.139558	73.68	0.302786	305.4	0.557793	3.08	6.6	9.43	160	154	-6	97	101	4	372	343	-29	28.7	31.6	2.9	16.7	18.4	1.7	1.71	1.72	0.01	14.7	17.6	2.9	0.13	0.04	-0.09	35.9	39.8	3.9
018WZ	王震	1	35	1	1	1.8	110	33.9506	2	2	138	94	2579.11	91.8	0.142375	122.5	0.427473	277.36	0.430164	9.16	12.85	18.59	138	139	1	94	96	2	481	306	-175	33.6	33.6	0	17.8	17.6	-0.2	1.89	1.91	0.02	16	16.6	0.6	0.1	0.06	-0.04	35	49.4	14.4
020CM	陈萌	2	44	1	1	1.58	78	31.245	1	1	145	102	1245.72	60.74	0.195036	66.86	0.483046	100.31	0.322095	8.6	11.92	9.44	145	143	-2	102	100	-2	531	364	-167	28.4	33.5	5.1	17.3	20.2	2.9	1.64	1.66	0.02	11.2	12.1	0.9	0.35	0.4	0.05	28.1	48.8	20.7
023WJL	王家梁	1	55	1	1	1.7	62	21.4533	1.5	1	151	105	3026.88	72.84	0.0962575	158.85	0.472318	319.52	0.422243	19.99	37.15	44.97	151	149	-2	105	95	-10	536	695	159	38.9	37.9	-1	18.8	23	4.2	1.54	1.65	0.11	14.7	14.9	0.2	0.22	0.35	0.13	24.7	31.5	6.8
024YHY	于会雨	1	56	1	1	1.74	72	23.7812	2	1	155	97	1575.32	43.96	0.111622	56.11	0.320563	223.59	0.567732	6.16	13.5	15.62	155	135	-20	97	85	-12	349	520	171	30.7	30.6	-0.1	20.2	20.2	0	1.52	1.51	-0.01	17.6	15.7	-1.9	0.13	0.22	0.09	35.2	27.3	-7.9
025YGC	于国昌	1	56	1	1	1.71	74	25.3069	5	1	153	84	1479.29	52.98	0.143258	79.75	0.485199	137.39	0.371503	4.1	8.66	14.94	153	136	-17	84	78	-6	388	634	246	28.7	34.9	6.2	18.1	19.4	1.3	1.59	1.8	0.21	14.7	16	1.3	0.19	0.18	-0.01	34.4	30.4	-4
027LK	卢康	1	43	1	1	1.8	84	25.9259	7	1	157	109	1979.62	99.37	0.200786	91.76	0.417171	189.08	0.382053	12.8	14.71	9.32	157	130	-27	109	90	-19	475	378	-97	32.1	30.5	-1.6	17.6	16.6	-1	1.82	1.84	0.02	15	15.8	0.8	0.15	0.05	-0.1	38.2	38.5	0.3
028SG	宋国	1	43	1	1	1.73	78	26.0617	6	2	138	87	1897.74	75.98	0.160148	99.47	0.471735	174.64	0.368101	11.07	19.73	18.38	138	135	-3	87	87	0	496	489	-7	30	39.1	9.1	18.9	24.1	5.2	1.59	1.62	0.03	13.5	22.2	8.7	0.29	0.08	-0.21	36	35.1	-0.9
030LFX	吕凤霞	2	48	1	1	1.52	65	28.1337	2	1	121	82	1575.8	41.03	0.10415	64.4	0.367813	208.03	0.528062	6.8	15.22	22.45	121	116	-5	82	80	-2	290	288	-2	31.1	35.6	4.5	18.5	21.5	3	1.68	1.66	-0.02	14.9	18.3	3.4	0.19	0.15	-0.04	48.2	49.4	1.2
031YL	于磊	1	61	1	1	1.78	78	24.6181	5	1	185	115	2179.63	58.98	0.108239	81.11	0.334915	303.5	0.556975	10.28	22.84	20.48	185	151	-34	115	91	-24	367	330	-37	31	34.1	3.1	19.1	18.6	-0.5	1.62	1.83	0.21	14.7	15.3	0.6	0.23	0.18	-0.05	43.9	49.4	5.5
032WMD	王茂杜	1	54	1	1	1.74	85	28.075	4	1	169	102											169			102			396			28.1			18.4			1.53			13.2			0.28			41.2
035ZXY	张宪勇	1	59	1	1	1.78	76	23.9869	12	1	156	98	2390.56	74.69	0.124975	123.8	0.466083	244.43	0.408992	12.55	26.54	33.36	156	142	-14	98	88	-10	533	415	-118	34.4	37.3	2.9	23	20.4	-2.6	1.5	1.83	0.33	18.1	19.1	1	0.21	0.06	-0.15	31.2	42.9	11.7
036ZHW	赵宏伟	1	61	1	1	1.78	83	26.1962	10	1	137	80	1625.66	52.55	0.129301	106.85	0.591544	113.46	0.279173	7.42	17.59	30.48	137	132	-5	80	70	-10	500	581	81	40.5	39.2	-1.3	24.3	22.6	-1.7	1.68	1.73	0.05	18.2	18.4	0.2	0.25	0.19	-0.06	46	32	-14
038CSH	陈素华	2	50	1	1	1.66	64	23.2254	6	1	138	82	1672.68	46.31	0.110744	106.45	0.572763	132.33	0.31645	8.09	18.46	30.93	138	139	1	82	82	0	470	351	-119	38.5	37.8	-0.7	24.1	20.7	-3.4	1.6	1.83	0.23	21	19.4	-1.6	0.13	0.06	-0.07	36	48.3	12.3
039ZJM	张建民	1	50	1	1	1.8	90	27.7778	5	1	150	98	2170.98	70.58	0.130043	125.97	0.52222	188.71	0.347696	6.2	13.44	20.32	150	143	-7	98	98	0	217	359	142	54.4	42.5	-11.9	30.8	28.4	-2.4	1.77	1.5	-0.27	26.9	25.5	-1.4	0.13	0.1	-0.03	99.6	49.6	-50
041ZMX	张明显	1	64	1	1	1.7	72.5	25.0865	2	2	158	81	2949.97	91.03	0.123432	133.02	0.405828	347.18	0.470757	6.63	13.36	22.59	158	159	1	81	85	4	475	515	40	25.4	30.2	4.8	17.8	17.7	-0.1	1.43	1.71	0.28	11.2	11.3	0.1	0.37	0.36	-0.01	27.5	33.6	6.1
042ZJH	周景华	1	64	1	1	1.66	75	27.2173	2	1	152	99	3228.14	113.88	0.141109	146.01	0.407073	364.67	0.451864	8.77	15.77	23.77	152	143	-9	99	95	-4	462	687	225	28.5	29	0.5	18.1	16.6	-1.5	1.57	1.75	0.18	16.1	15.5	-0.6	0.11	0.07	-0.04	25.7	20.8	-4.9
045LDC	李福存	1	54	1	1	1.75	97.5	31.8367	1	2	150	82	2294.94	78.69	0.137154	113.98	0.446992	238.63	0.415924	5.12	9.84	11.29	150	152	2	82	85	3	383	401	18	25.6	30.3	4.7	18.9	20.7	1.8	1.35	1.46	0.11	13.5	17.8	4.3	0.29	0.14	-0.15	35	27.7	-7.3
046WQC	王清超	1	44	1	1	1.73	90	30.0712	8	1	144	90	2541.93	100.75	0.158541	119.15	0.421864	266.69	0.419665	4.42	10.95	7.81	144	148	4	90	96	6	623	549	-74	28.4	28.9	0.5	14.4	20.9	6.5	1.97	1.38	-0.59	12.7	11.2	-1.5	0.12	0.46	0.34	25.1	29.3	4.2
047CY	陈燕	2	54	1	1	1.67	65	23.3067	1	1	105	74											105			74			386			23.5			16.3			1.44			10.1			0.38			30
049LDK	李大可	2	53	1	1	1.72	75	25.3515	3	1	164	92	1653.93	58.79	0.142183	96.98	0.527725	136.47	0.33005	6.79	14.88	17.13	164	136	-28	92	82	-10	312	412	100	32.1	32.3	0.2	18.4	19	0.6	1.74	1.69	-0.05	15.8	17.6	1.8	0.14	0.08	-0.06	49.4	34.9	-14.5
050DDP	杜德朋	1	38	1	1	1.73	63	21.0498	1	1	113	75	2368.82	80.8	0.136439	140.9	0.53533	194.43	0.328315	7.01	15.14	18.28	113	121	8	75	75	0	388	409	21	27.2	30.5	3.3	15.8	16	0.2	1.72	1.91	0.19	11.6	14.7	3.1	0.27	0.08	-0.19	35.4	35.6	0.2
051JZX	姜在先	1	61	1	1	1.66	75	27.2173	1	1	135	84	2428.53	85.81	0.141337	137.82	0.510753	211.24	0.347931	6.53	12.55	12.48	135	116	-19	84	74	-10	415	430	15	28.5	30.3	1.8	15.3	17.8	2.5	1.86	1.7	-0.16	12.4	15.3	2.9	0.19	0.14	-0.05	41.9	35.6	-6.3
052SLL	孙丽丽	2	61	1	1	1.67	64	22.9481	10	1	135	90	1866.7	78.41	0.168018	107.99	0.520657	145.31	0.311373	3.51	7.06	12.7	135	132	-3	90	85	-5	512	465	-47	33	32	-1	23.9	17.4	-6.5	1.38	2.18	0.8	11.7	13.2	1.5	0.51	0.1	-0.41	25	37.4	12.4
055YQ	杨倩	2	54	1	1	1.68	64	22.6757	2	1	122	75											122			75			581			29.9			15.8			1.89			12.9			0.18			32.7
062YY	于洋	2	48	1	1	1.65	75	27.5482	1	1	123	81	1743.56	50.45	0.11574	84.92	0.438345	194.37	0.445915	10	16.11	16.38	123	116	-7	81	80	-1	222	283	61	30	34	4	17.8	19.3	1.5	1.69	1.76	0.07	12.2	17.3	5.1	0.31	0.1	-0.21	56	50.8	-5.2
065PD	庞东	1	52	1	1	1.76	90	29.0548	5	2	137	90	3901.86	175.87	0.180294	191.58	0.441897	368.63	0.377902	4.52	7.11	8.82	137	146	9	90	94	4	467	346	-121	32.3	34.3	2	20.4	23.2	2.8	1.58	1.48	-0.1	12.7	18.7	6	0.38	0.19	-0.19	39.6	44	4.4
001WFQ	吴风清	1	64	1	2	1.65	62	22.7732	7	2	146	85	2131.29	86.76	0.162831	85.31	0.360247	254.12	0.476932	31.79	18.92	5.1	146	137	-9	85	86	1	359	462	103	38.5	44.2	5.7	19.9	20.7	0.8	1.93	2.14	0.21	17.8	18.9	1.1	0.11	0.09	-0.02	50.4	55.9	5.5
006LX	李新	1	40	1	2	1.67	93	33.3465	6	1	144	99	1907.84	53.96	0.113133	40.2	0.189639	332.55	0.697228	2.66	5.74	5.72	144	132	-12	99	96	-3	301	317	16	20.4	29.3	8.9	15	18.8	3.8	1.36	1.56	0.2	13.2	17.2	4	0.12	0.09	-0.03	22.4	39.6	17.2
008ZZG	张志刚	1	57	1	2	1.75	75	24.4898	10	1	137	90	1285.49	45.25	0.140802	39.71	0.278018	186.77	0.581164	2.89	5.28	6.03	137	151	14	90	96	6	409	366	-43	44.2	26.9	-17.3	19.8	22.2	2.4	2.23	1.21	-1.02	17.8	14	-3.8	0.1	0.37	0.27	53.9	32.4	-21.5
009YZC	杨兆才	1	58	2	2	1.69	80	28.0102	3	2	147	89	1581.01	77.92	0.19714	69.97	0.398309	159.92	0.404602	17.61	22.91	16.47	147	152	5	89	90	1	499	533	34	35	34	-1	21.8	22.9	1.1	1.61	1.48	-0.13	14.7	12.2	-2.5	0.33	0.47	0.14	37.6	30	-7.6
010YZJ	杨兆杰	1	57	2	2	1.68	75.5	26.7503	11	1	148	101	1627.53	89.93	0.221022	54.92	0.303699	193.45	0.475444	14.17	15.86	9.72	148	154	6	101	98	-3	438	528	90	27.9	23.5	-4.4	19.3	18.4	-0.9	1.45	1.28	-0.17	14.2	12.6	-1.6	0.26	0.32	0.06	27.3	17.1	-10.2
012DCF	代传峰	1	59	1	2	1.65	62	22.7732	2	2	113	65	1359.25	49.23	0.144874	77.08	0.51037	117.12	0.344661	4.83	9.15	16.72	113	133	20	65	85	20	357	380	23	36.3	39.3	3	25.4	28.9	3.5	1.43	1.36	-0.07	19	20.6	1.6	0.25	0.29	0.04	32.4	47.6	15.2
013LLJ	李连进	1	59	1	2	1.7	97.5	33.737	2	2	134	86	1912.01	52.87	0.110606	106.78	0.502623	184.97	0.386965	9.27	20.8	26.32	134	130	-4	86	80	-6	383	428	45	22.1	30.5	8.4	18.4	19	0.6	1.2	1.61	0.41	11.9	15.5	3.6	0.35	0.18	-0.17	28.3	35.5	7.2
014MZE	马中娥	2	49	2	2	1.68	74	26.2188	1	1	123	86	1263.47	44.41	0.140597	54.92	0.391208	147.96	0.468424	11.48	19.56	16.26	123	125	2	86	86	0	396	462	66	44	45.8	1.8	24.1	25.1	1	1.83	1.82	-0.01	22.2	21.7	-0.5	0.08	0.14	0.06	49	45.9	-3.1
015STJ	宋天钧	1	36	1	2	1.8	92	28.3951	5	2	155	105	2140.43	69.94	0.130703	70.4	0.296015	306.77	0.573287	5.57	16.43	9.98	155	140	-15	105	79	-26	370	301	-69	34.1	34.9	0.8	20.7	20.4	-0.3	1.65	1.71	0.06	17.1	18.4	1.3	0.17	0.1	-0.07	44.3	49.8	5.5
016LZ	李真	2	46	1	2	1.65	83	30.4867	10	1	142	89	1339.31	42.12	0.125796	80.04	0.537859	112.63	0.336382	6.89	19.18	17.24	142	124	-18	89	82	-7	370	417	47	36.7	35.4	-1.3	17.1	16.3	-0.8	2.13	2.17	0.04	15	13.7	-1.3	0.12	0.16	0.04	43.7	43.6	-0.1
017QD	亓东	1	42	1	2	1.7	80	27.6817	2	1	129	94	1669.54	71.63	0.171616	99.49	0.536321	121.86	0.291961	10.43	19.06	15.85	129	132	3	94	93	-1	407	483	76	24.2	26.3	2.1	15.3	16.6	1.3	1.58	1.58	0	13.1	14.1	1	0.14	0.15	0.01	24.1	23.9	-0.2
019JHS	鞠恒山	1	57	1	2	1.67	80	28.6851	3	1	188	107											188			107			359			37.3			20.7			1.8			16.8			0.19			49
021WCF	王长房	1	59	1	2	1.6	90	35.1562	6	1	142	92	1334.6	37.22	0.111554	91.48	0.616904	90.56	0.271422	9.75	22.53	28.35	142	144	2	92	99	7	393	312	-81	37.5	38.5	1	19.4	21	1.6	1.93	1.83	-0.1	16.8	20.4	3.6	0.13	0.03	-0.1	44.6	50.5	5.9
022DXM	代新民	1	57	1	2	1.65	75	27.5482	4	1	162	98											162			98			264			47.3			25.1			1.88			24.8			0.01			59.3
026GGR	郭根荣	2	56	1	2	1.48	53	24.1965	8	1	150	96	1477.72	33.49	0.0906532	81.76	0.497956	151.97	0.411363	11.26	22.16	32.36	150	148	-2	96	90	-6	254	335	81	45.2	36.6	-8.6	26.9	26.4	-0.5	1.68	1.39	-0.29	22.3	19.8	-2.5	0.17	0.25	0.08	61.5	48.1	-13.4
029GYQ	顾亚芹	2	61	1	2	1.48	49	22.3703	10	1	174	87	1501.61	38.64	0.10293	72.9	0.436931	172.72	0.460093	11.64	19.78	22.22	174	142	-32	87	78	-9	378	409	31	32.4	31.7	-0.7	19.2	18.6	-0.6	1.69	1.7	0.01	12.3	17.3	5	0.36	0.07	-0.29	48.2	27	-21.2
033WLA	王留安	1	63	1	2	1.72	82	27.7177	3	2	161	95	1622.18	49.73	0.122625	87.7	0.486567	158.5	0.390832	9.19	21.04	24.82	161	111	-50	95	76	-19	437	423	-14	32.3	25.3	-7	21.3	16	-5.3	1.52	1.58	0.06	16.7	12.4	-4.3	0.22	0.22	0	33.9	33.9	0
034LFZ	刘风芝	2	66	1	2	1.65	62.5	22.9568	3	2	148	78	1769.97	47.73	0.107866	91.06	0.463025	189.93	0.429228	15.07	28.36	34.17	148	143	-5	78	74	-4	481	467	-14	24.1	26.6	2.5	18.1	19.4	1.3	1.33	1.37	0.04	12.9	15.8	2.9	0.29	0.19	-0.1	30.4	24.5	-5.9
037NAZ	牛爱芝	2	60	1	2	1.6	60	23.4375	3	2	162	78	1809.34	50.04	0.110626	112.37	0.55895	149.46	0.330419	12.12	20.84	30.98	162	151	-11	78	76	-2	317	357	40	37.6	30.6	-7	21.8	16.9	-4.9	1.72	1.81	0.09	20.8	12.1	-8.7	0.05	0.28	0.23	49.3	47.2	-2.1
040ZXH	张兴华	1	66	1	2	1.78	90	28.4055	4	1	131	76	3297.52	109.5	0.132827	154.74	0.422336	366.69	0.444807	7.05	14.1	22.17	131	136	5	76	75	-1	380	399	19	36.1	34	-2.1	21.8	18.3	-3.5	1.66	1.86	0.2	19.3	14.7	-4.6	0.11	0.2	0.09	34.6	46.8	12.2
043ZHY	张海元	1	68	1	2	1.83	80	23.8884	3	2	145	87	2051.42	67.77	0.132143	92.98	0.407922	235.9	0.459974	6.08	12.19	11.48	145	145	0	87	96	9	320	259	-61	27.8	31.5	3.7	21.4	21.3	-0.1	1.3	1.48	0.18	13.3	11.7	-1.6	0.38	0.45	0.07	27.4	59.6	32.2
044ZFQ	周福芹	1	66	1	2	1.65	70	25.7117	4	1	150	104	1742.15	68.27	0.156749	70.02	0.361725	209.74	0.481566	4.28	7.57	7.08	150	151	1	104	95	-9	383	428	45	33.5	35.7	2.2	22.9	17.7	-5.2	1.4	2.02	0.62	11.7	13.7	2	0.49	0.23	-0.26	46.7	38.3	-8.4
048SX	孙霞	2	58	1	2	1.63	63	23.7118	10	1	130	79	1829.82	74.43	0.162705	90.24	0.443847	180.01	0.393503	4.64	7.94	11.76	130	124	-6	79	76	-3	351	375	24	27.9	28.5	0.6	16	16.8	0.8	1.74	1.7	-0.04	13.5	15.5	2	0.16	0.08	-0.08	27.6	31.3	3.7
053CXY	崔秀英	2	61	1	2	1.64	63	23.4236	1	1	108	78	2001.71	79.07	0.158005	104.14	0.46823	187.1	0.37388	9.93	14.1	19.32	108	105	-3	78	76	-2	304	351	47	21	29.4	8.4	15.3	20.6	5.3	1.37	1.43	0.06	10.1	14.7	4.6	0.34	0.29	-0.05	33.2	39.3	6.1
054MSF	孟淑芬	2	61	1	2	1.63	59	22.2063	2	2	145	83	2177.9	82.82	0.15211	100.24	0.414234	236.17	0.433757	9.98	12.5	18.09	145	126	-19	83	71	-12	486	359	-127	35	37.1	2.1	21.8	18.8	-3	1.61	1.97	0.36	17.8	14.7	-3.1	0.18	0.22	0.04	38.3	48.4	10.1
056HDQ	何电琴	2	67	1	2	1.6	46	17.9688	17	1	177	78	1465.89	52.23	0.142521	77.62	0.476557	139.66	0.381093	4.52	8.46	8.58	177	129	-48	78	56	-22	327	248	-79	35.5	35.9	0.4	25.9	26.4	0.5	1.37	1.36	-0.01	19.3	21.2	1.9	0.25	0.2	-0.05	49.9	49.7	-0.2
057ZG	曾刚	1	47	1	2	1.74	90	29.7265	5	2	187	118	2704.8	89.08	0.131736	160.26	0.533252	226.58	0.335078	9.72	22.82	13.41	187	165	-22	118	100	-18	290	401	111	29.2	26.2	-3	15.9	17.7	1.8	1.84	1.48	-0.36	13.7	12.5	-1.2	0.14	0.29	0.15	46.3	33.4	-12.9
058GHJ	高华军	1	44	1	2	1.75	98	32	4	2	127	85	3343.18	118.57	0.141865	165.47	0.445453	345.04	0.412829	8.34	23.98	15.66	127	128	1	85	85	0	415	491	76	29.5	26.9	-2.6	21.3	17.8	-3.5	1.67	1.51	-0.16	12.2	11.7	-0.5	0.43	0.34	-0.09	42.1	28.2	-13.9
059ZJJ	赵家军	1	65	1	2	1.7	82	28.3737	2	1	127	77	2182.93	80.85	0.14815	129.27	0.532967	174.06	0.318947	12.42	19.4	16.19	127	114	-13	77	72	-5	710	663	-47	27.6	25.1	-2.5	16.7	18.3	1.6	1.65	1.37	-0.28	14.4	10.1	-4.3	0.14	0.45	0.31	23.3	21.8	-1.5
060ZHX	张怀香	2	54	1	2	1.58	72.5	29.0418	15	1	169	101	1560.75	42.48	0.108871	80.17	0.462297	167.32	0.428819	5.09	11.7	10.63	169	134	-35	101	91	-10	341	391	50	34.5	40.1	5.6	18.3	25.4	7.1	1.89	1.58	-0.31	13.7	18.3	4.6	0.25	0.28	0.03	49.9	48.1	-1.8
063SML	孙美玲	2	43	1	2	1.6	69	26.9531	3	1	157	90	1356.43	44.32	0.130696	78.07	0.517999	119.2	0.351511	5.66	10.88	18.34	157	156	-1	90	94	4	293	293	0	28.2	36.1	7.9	16.5	19.3	2.8	1.71	1.87	0.16	11.3	17.8	6.5	0.32	0.08	-0.24	49.6	49.3	-0.3
064LZJ	李志军	1	52	1	2	1.7	95	32.872	3	2	143	79	2156.45	74.6	0.138376	105.13	0.438763	228.04	0.422991	7.07	13.44	15.33	143	144	1	79	90	11	333	254	-79	23	28.5	5.5	18.5	17.7	-0.8	1.24	1.61	0.37	10.9	11.5	0.6	0.41	0.35	-0.06	42.4	53.2	10.8
[truncated: 84 more columns]
